# Supplementary figures and images for: Platinum screen printed electrodes for the electroanalytical sensing of hydrazine and hydrogen peroxide
Source: Royal Society of Chemistry journal article supplement (doi:10.1039/c2ay05934g), 2012-01-01

ESI 1:

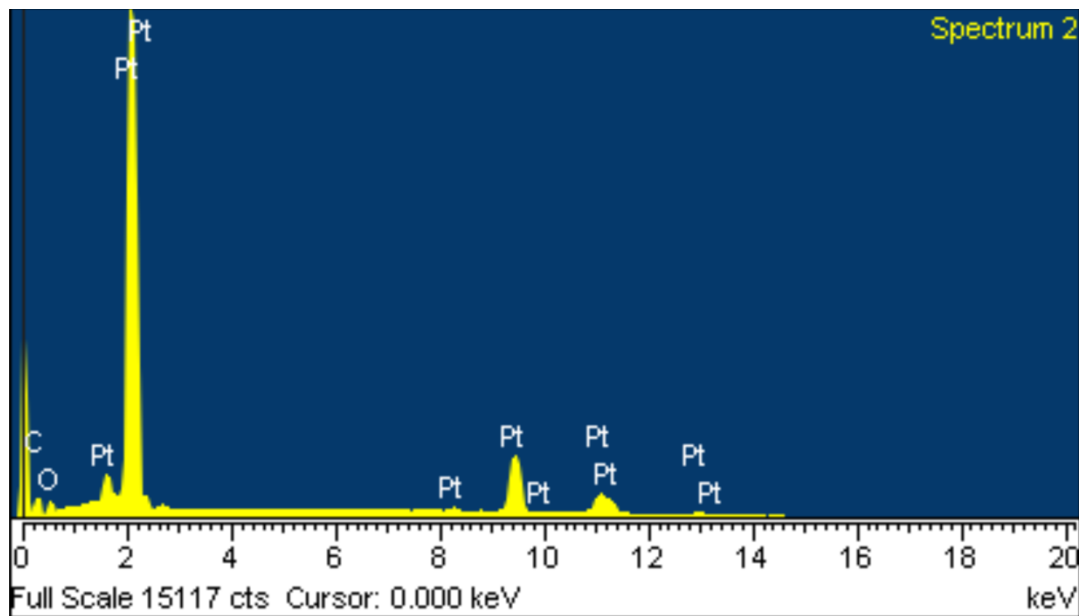

ESI 2:

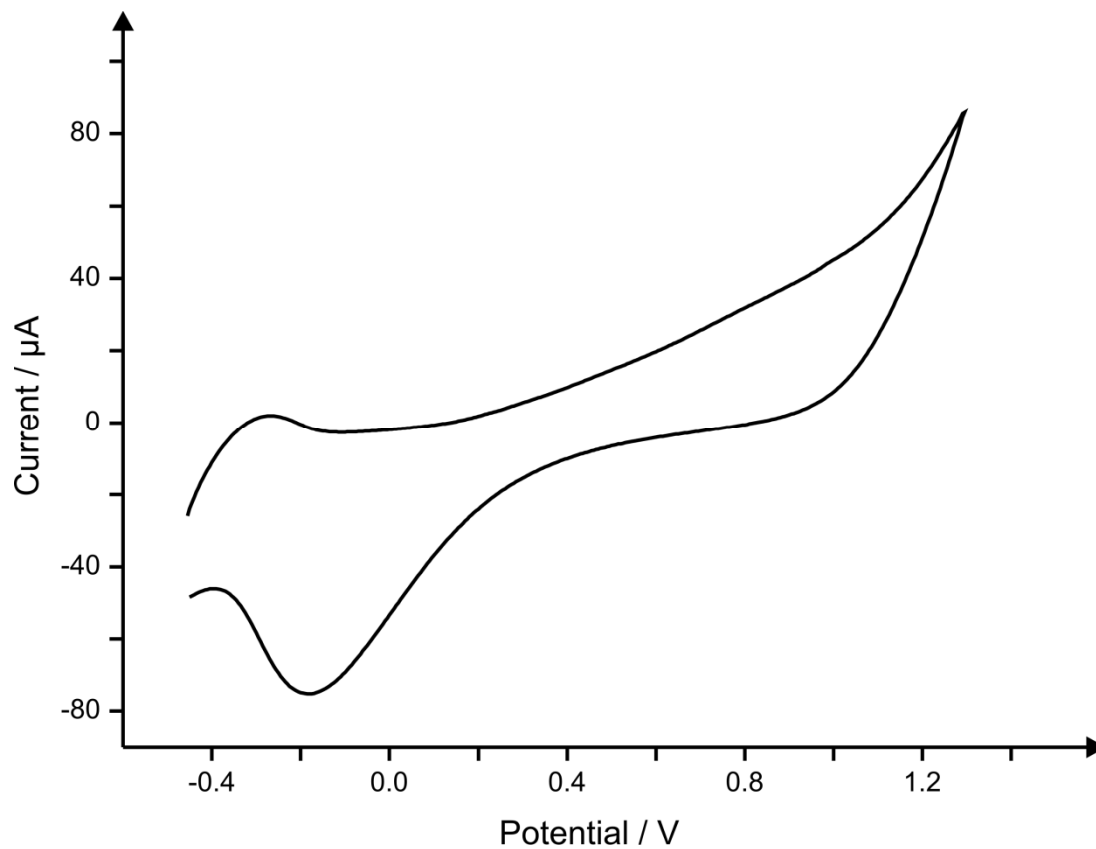

Supplement: c2ay05934g.pdf [file c2ay05934g.pdf]
